# Supplementary material for: Catanionic vesicles and DNA complexes: a strategy towards novel gene delivery systems
Source: Royal Society of Chemistry journal article supplement (doi:10.1039/c5ra15466a), 2015-01-01
Supplement: c5ra15466a1.pdf [file c5ra15466a1.pdf]

## Supporting Information

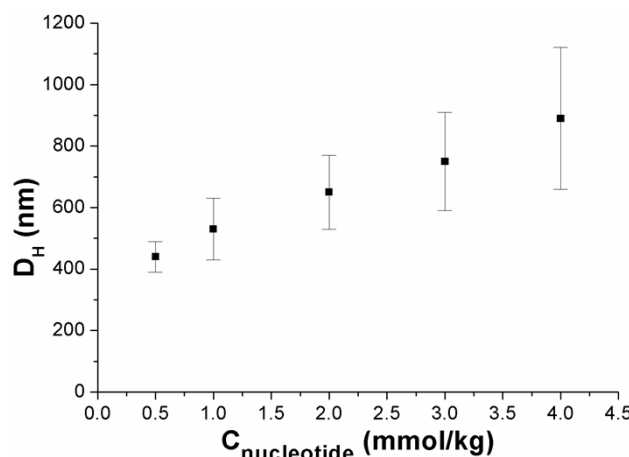

**Figure S.1** Hydrodynamic diameter,  $D_H$  (nm) of DNA in aqueous solutions at different concentrations,  $C_{\text{nucleotide}}$  (mmol/kg). Measurements refer to 25°C.

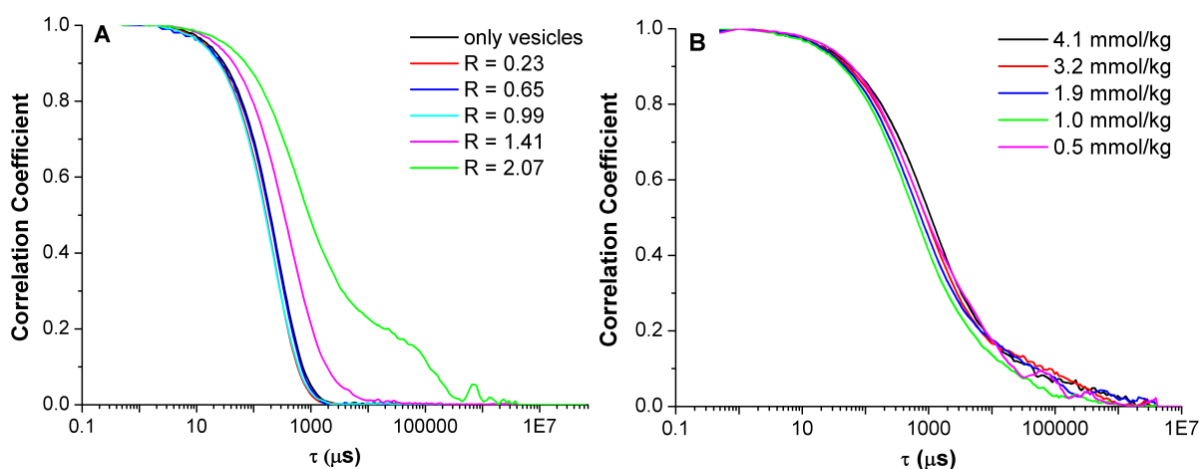

**Figure S.2 (A)** Correlation coefficient vs. delay time ( $\tau$ ,  $\mu\text{s}$ ) for DiDAB/8-SHS vesicles and DNA at  $R$  ( $[\text{PO}_4^-]/[\text{DiDA}^+]$ ) = 0 (—), 0.23 (—), 0.65 (—), 0.99 (—), 1.41 (—), 2.07 (—) **(B)** Correlation coefficient vs.  $\tau$  for DNA aqueous solutions at  $C_{\text{nucleotide}}$  = 4.1 (—), 3.2 (—), 1.9 (—), 1.0 (—), 0.5 (—) mmol/kg. Measurements refer to 25°C.

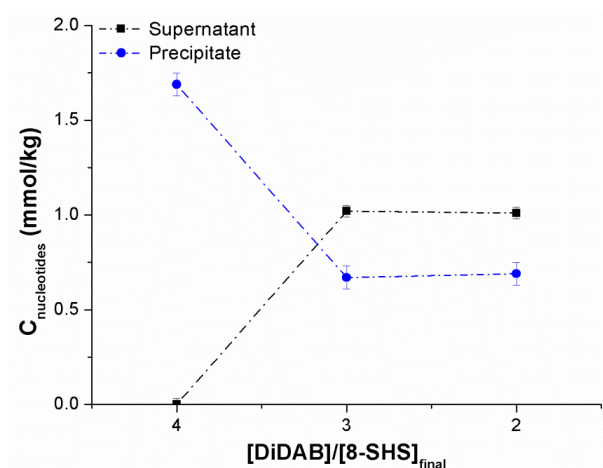

**Figure S.3** Nucleotides concentration ( $C_{nucleotide}$ , mmol/kg) vs. the final [DiDAB]/[8-SHS] mole ratio in the supernatant (■) and in the precipitate (●). Data refer to 25.0 °C. Error bars represent standard deviations. Dashed lines are for visual purposes.

**Procedure S.1: Determination of the proportion of the different species in the precipitates by elemental analysis**

The composition of the precipitates is determined from elementary analysis as % of C, N, H, S. We use the C, H, N, S proportion of the anionic surfactant (that is the content of C, H and S), the proportion of DiDAB (that is C,H and N) and that of DNA (C, H and N) which summed in the adequate proportion produced that found in the precipitate. Because the system is overdetermined, 4 equations with 3 parameters (namely DiDAB per base, 8-SHS per base and amount of NaBr released) a minimum squared differences procedure has been used.
